# Supplementary material for: Umbilical Cord Hepcidin as a Predictive Biomarker for Neonatal Iron Deficiency
Source: Research Square preprint supplement (doi:10.21203/rs.3.rs-7037609/v1), 2025-08-18
Supplement: Supplementary file 1 [file 2e9f95b231a37cf49d80a6c7.pdf]

|    | maternal age | education | first pregnancy | P | O | abortion   | interval (years) |
|----|--------------|-----------|-----------------|---|---|------------|------------------|
| 1  | 24           | educated  | no              | 2 | 2 | 0 negative | 2                |
| 2  | 33           | educated  | no              | 3 | 3 | 0 negative | 1.25             |
| 3  | 21           | educated  | yes             | 1 | 1 | 0 negative |                  |
| 4  | 29           | educated  | no              | 2 | 2 | 0 negative | 4                |
| 5  | 28           | educated  | yes             | 1 | 1 | 0 negative |                  |
| 6  | 23           | educated  | yes             | 1 | 1 | 0 negative |                  |
| 7  | 31           | educated  | no              | 4 | 3 | 1 positive | 2                |
| 8  | 23           | educated  | yes             | 1 | 1 | 0 negative |                  |
| 9  | 23           | educated  | yes             | 1 | 1 | 0 negative |                  |
| 10 | 27           | educated  | no              | 2 | 1 | 1 positive | 1.25             |
| 11 | 26           | educated  | no              | 3 | 1 | 2 positive | 0.3              |
| 12 | 22           | educated  | yes             | 1 | 1 | 0 negative |                  |
| 13 | 27           | educated  | yes             | 1 | 1 | 0 negative |                  |
| 14 | 32           | educated  | no              | 3 | 1 | 2 positive | 0.6              |
| 15 | 21           | educated  | yes             | 1 | 1 | 0 negative |                  |
| 16 | 23           | educated  | yes             | 1 | 1 | 0 negative |                  |
| 18 | 21           | educated  | yes             | 1 | 1 | 0 negative |                  |
| 19 | 31           | educated  | no              | 2 | 2 | 0 negative | 5                |
| 20 | 25           | educated  | yes             | 1 | 1 | 0 negative |                  |
| 21 | 21           | educated  | yes             | 1 | 1 | 0 negative |                  |
| 22 | 30           | educated  | no              | 3 | 3 | 0 negative | 4                |
| 23 | 21           | educated  | yes             | 1 | 1 | 0 negative |                  |
| 24 | 21           | educated  | yes             | 1 | 1 | 0 negative |                  |
| 25 | 25           | educated  | no              | 2 | 1 | 1 positive | 0.25             |
| 26 | 22           | educated  | no              | 3 | 1 | 2 positive | 0.7              |
| 27 | 23           | educated  | yes             | 1 | 1 | 0 negative |                  |
| 28 | 25           | educated  | yes             | 1 | 1 | 0 negative |                  |
| 29 | 21           | educated  | no              | 2 | 1 | 1 positive | 0.3              |
| 30 | 33           | educated  | no              | 4 | 4 | 0 negative | 5                |
| 31 | 29           | educated  | no              | 3 | 2 | 1 positive | 5                |
| 32 | 20           | educated  | yes             | 1 | 1 | 0 negative |                  |
| 33 | 26           | educated  | no              | 2 | 2 | 0 negative | 2                |
| 34 | 28           | educated  | no              | 3 | 3 | 0 negative | 4                |
| 35 | 31           | educated  | no              | 3 | 2 | 1 positive | 0.3              |
| 36 | 24           | educated  | no              | 2 | 1 | 1 positive | 0.75             |
| 37 | 26           | educated  | yes             | 1 | 1 | 0 negative |                  |
| 38 | 32           | educated  | no              | 3 | 3 | 0 negative | 4                |
| 39 | 22           | educated  | yes             | 1 | 1 | 0 negative |                  |
| 40 | 23           | educated  | yes             | 1 | 1 | 0 negative |                  |

|    |    |          |     |   |   |            |      |
|----|----|----------|-----|---|---|------------|------|
| 41 | 19 | educated | yes | 1 | 1 | 0 negative |      |
| 42 | 21 | educated | yes | 1 | 1 | 0 negative |      |
| 43 | 27 | educated | yes | 1 | 1 | 0 negative |      |
| 44 | 20 | educated | yes | 1 | 1 | 0 negative |      |
| 45 | 30 | educated | no  | 3 | 3 | 0 negative | 6    |
| 46 | 27 | educated | no  | 4 | 4 | 0 negative | 1.5  |
| 47 | 34 | educated | no  | 5 | 5 | 0 negative | 1.5  |
| 48 | 29 | educated | no  | 4 | 4 | 0 negative | 2    |
| 49 | 25 | educated | yes | 1 | 1 | 0 negative |      |
| 50 | 19 | educated | no  | 2 | 1 | 1 positive | 0.6  |
| 51 | 28 | educated | yes | 1 | 1 | 0 negative |      |
| 52 | 33 | educated | no  | 3 | 3 | 0 negative | 3.5  |
| 53 | 20 | educated | yes | 1 | 1 | 0 negative |      |
| 54 | 23 | educated | yes | 1 | 1 | 0 negative |      |
| 55 | 24 | educated | yes | 1 | 1 | 0 negative |      |
| 56 | 34 | educated | no  | 2 | 1 | 1 positive | 6    |
| 57 | 36 | educated | no  | 6 | 5 | 1 positive | 4    |
| 58 | 24 | educated | yes | 1 | 1 | 0 negative |      |
| 59 | 24 | educated | yes | 1 | 1 | 0 negative |      |
| 60 | 38 | educated | no  | 3 | 3 | 0 negative | 5    |
| 61 | 30 | educated | no  | 3 | 3 | 0 negative | 3    |
| 62 | 26 | educated | yes | 1 | 1 | 0 negative |      |
| 63 | 27 | educated | yes | 1 | 1 | 0 negative |      |
| 64 | 31 | educated | no  | 2 | 2 | 0 negative | 7    |
| 65 | 29 | educated | no  | 3 | 2 | 1 positive | 0.6  |
| 66 | 24 | educated | no  | 3 | 3 | 0 negative | 1.3  |
| 67 | 27 | educated | yes | 1 | 1 | 0 negative |      |
| 68 | 20 | educated | no  | 2 | 2 | 0 negative | 0.5  |
| 69 | 25 | educated | no  | 3 | 3 | 0 negative | 2    |
| 70 | 19 | educated | yes | 1 | 1 | 0 negative |      |
| 71 | 28 | educated | yes | 1 | 1 | 0 negative |      |
| 72 | 32 | educated | no  | 3 | 1 | 2 positive | 0.75 |
| 73 | 22 | educated | yes | 1 | 1 | 0 negative |      |
| 74 | 30 | educated | no  | 3 | 3 | 0 negative | 5    |
| 75 | 29 | educated | no  | 3 | 3 | 0 negative | 2.1  |
| 76 | 24 | educated | no  | 2 | 2 | 0 negative | 0.3  |
| 77 | 23 | educated | no  | 2 | 2 | 0 negative | 0.8  |
| 78 | 31 | educated | no  | 2 | 2 | 0 negative | 6.25 |
| 79 | 23 | educated | yes | 1 | 1 | 0 negative |      |

|     |    |          |     |   |   |            |      |
|-----|----|----------|-----|---|---|------------|------|
| 80  | 23 | educated | yes | 1 | 1 | 0 negative |      |
| 81  | 29 | educated | no  | 2 | 2 | 0 negative | 0.5  |
| 82  | 32 | educated | no  | 4 | 4 | 0 negative | 3.3  |
| 83  | 19 | educated | yes | 1 | 1 | 0 negative |      |
| 84  | 27 | educated | yes | 1 | 1 | 0 negative |      |
| 85  | 28 | educated | yes | 1 | 1 | 0 negative |      |
| 86  | 34 | educated | no  | 3 | 3 | 0 negative | 6    |
| 87  | 24 | educated | yes | 1 | 1 | 0 negative |      |
| 88  | 25 | educated | yes | 1 | 1 | 0 negative |      |
| 89  | 20 | educated | yes | 1 | 1 | 0 negative |      |
| 90  | 35 | educated | no  | 5 | 4 | 1 positive | 5.5  |
| 91  | 22 | educated | no  | 2 | 1 | 1 positive | 0.5  |
| 92  | 26 | educated | no  | 3 | 2 | 1 positive | 0.4  |
| 93  | 23 | educated | yes | 1 | 1 | 0 negative |      |
| 94  | 33 | educated | no  | 4 | 4 | 0 negative | 3    |
| 95  | 20 | educated | yes | 1 | 1 | 0 negative |      |
| 96  | 22 | educated | yes | 1 | 1 | 0 negative |      |
| 97  | 32 | educated | no  | 2 | 2 | 0 negative | 3.1  |
| 98  | 29 | educated | no  | 3 | 3 | 0 negative | 1.5  |
| 99  | 21 | educated | yes | 1 | 1 | 0 negative |      |
| 100 | 30 | educated | no  | 4 | 4 | 0 negative | 2.25 |
| 101 | 35 | educated | no  | 3 | 4 | 0 negative | 1.7  |
| 102 | 24 | educated | yes | 1 | 2 | 0 negative |      |
| 103 | 37 | educated | no  | 2 | 3 | 0 negative | 6    |
| 104 | 23 | educated | yes | 1 | 2 | 0 negative |      |
| 105 | 21 | educated | yes | 1 | 2 | 0 negative |      |
| 107 | 20 | educated | yes | 1 | 2 | 0 negative |      |
| 108 | 33 | educated | yes | 1 | 1 | 0 negative |      |
| 109 | 29 | educated | no  | 3 | 2 | 1 positive | 0.75 |
| 110 | 35 | educated | no  | 8 | 7 | 1 positive | 2    |
| 111 | 31 | educated | yes | 1 | 1 | 0 negative |      |
| 112 | 41 | educated | no  | 4 | 3 | 1 positive | 5    |
| 114 | 43 | educated | no  | 3 | 3 | 0 negative | 6    |
| 115 | 29 | educated | no  | 3 | 3 | 0 negative | 5    |
| 116 | 40 | educated | no  | 8 | 6 | 2 positive | 1    |
| 117 | 32 | educated | no  | 3 | 3 | 0 negative | 4    |
| 120 | 43 | educated | no  | 3 | 3 | 0 negative | 2    |

| heard IDA | effects IDA | Take iron | duration     | medical HX | congenital a | anemic M? | last HB | twin? |
|-----------|-------------|-----------|--------------|------------|--------------|-----------|---------|-------|
| no        | don't know  | yes       | from 2w- le: | positive   | no           | yes       | 10      | NO    |
| no        | don't know  | yes       | less than 1w | negative   | no           | yes       | 9.2     | no    |
| no        | don't know  | yes       | one month    | negative   | no           | NO        | 11.2    | NO    |
| yes       | don't know  | yes       | from 2w- le: | negative   | no           | NO        | 11      | NO    |
| yes       | don't know  | yes       | from 2w- le: | negative   | no           | NO        | 12.3    | NO    |
| no        | don't know  | yes       | one month    | negative   | no           | NO        | 11.8    | NO    |
| yes       | don't know  | yes       | from 2w- le: | positive   | no           | yes       | 9       | NO    |
| no        | don't know  | yes       | one month    | negative   | no           | yes       | 10.3    | NO    |
| no        | don't know  | yes       | from 2w- le: | negative   | no           | NO        | 11.4    | NO    |
| yes       | don't know  | yes       | one month    | positive   | no           | yes       | 9.8     | NO    |
| yes       | don't know  | yes       | one month    | negative   | no           | no        | 11.3    | NO    |
| yes       | don't know  | yes       | from 2w- le: | negative   | no           | NO        | 11.9    | NO    |
| yes       | don't know  | yes       | from 2w- le: | negative   | no           | NO        | 12      | NO    |
| no        | don't know  | yes       | one month    | positive   | no           | yes       | 10.8    | NO    |
| yes       | don't know  | no        | no           | negative   | no           | yes       | 10      | NO    |
| yes       | don't know  | yes       | one month    | negative   | no           | NO        | 12.4    | NO    |
| yes       | don't know  | yes       | one month    | negative   | no           | NO        | 11.3    | NO    |
| yes       | don't know  | yes       | one month    | negative   | no           | NO        | 11      | NO    |
| yes       | don't know  | yes       | one month    | negative   | no           | NO        | 11.3    | NO    |
| no        | don't know  | yes       | one month    | negative   | no           | YES       | 10.9    | NO    |
| yes       | don't know  | no        | no           | negative   | no           | yes       | 10.2    | NO    |
| no        | don't know  | yes       | from 2w- le: | negative   | no           | yes       | 9.8     | NO    |
| no        | don't know  | yes       | from 2w- le: | negative   | no           | yes       | 10.1    | NO    |
| no        | don't know  | yes       | one month    | negative   | no           | yes       | 10.9    | NO    |
| no        | don't know  | yes       | one month    | positive   | no           | yes       | 9.2     | NO    |
| no        | don't know  | yes       | one month    | negative   | no           | NO        | 11.4    | NO    |
| yes       | don't know  | yes       | one month    | negative   | no           | YES       | 10      | NO    |
| no        | don't know  | yes       | one month    | negative   | no           | yes       | 10.7    | NO    |
| no        | don't know  | no        | no           | negative   | no           | NO        | 11.8    | NO    |
| yes       | don't know  | yes       | from 2w- le: | negative   | no           | yes       | 10.9    | NO    |
| yes       | don't know  | yes       | one month    | negative   | no           | NO        | 12.1    | NO    |
| yes       | don't know  | yes       | from 2w- le: | negative   | no           | yes       | 9.2     | NO    |
| yes       | don't know  | yes       | less than 1w | negative   | no           | yes       | 9       | NO    |
| yes       | don't know  | yes       | 1week-2we    | negative   | no           | yes       | 9.2     | NO    |
| yes       | don't know  | yes       | one month    | positive   | no           | NO        | 11.1    | NO    |
| yes       | don't know  | yes       | one month    | negative   | no           | NO        | 11      | NO    |
| yes       | don't know  | no        | no           | negative   | no           | yes       | 10.4    | NO    |
| yes       | don't know  | yes       | one month    | negative   | no           | yes       | 10.9    | NO    |
| no        | don't know  | yes       | one month    | negative   | no           | yes       | 10.7    | NO    |

|     |            |     |                       |    |     |         |
|-----|------------|-----|-----------------------|----|-----|---------|
| no  | don't know | yes | one month ; negative  | no | yes | 10 NO   |
| no  | don't know | yes | one month ; negative  | no | yes | 9.7 NO  |
| yes | don't know | yes | one month ; negative  | no | yes | 9.1 NO  |
| no  | don't know | yes | one month ; negative  | no | NO  | 11.3 NO |
| yes | don't know | yes | from 2w- le; negative | no | NO  | 11.6 NO |
| yes | don't know | no  | no negative           | no | NO  | 11 NO   |
| yes | don't know | no  | no negative           | no | NO  | 11.9 NO |
| yes | don't know | no  | no negative           | no | NO  | 11.5 NO |
| yes | don't know | yes | one month ; negative  | no | yes | 10.8 NO |
| no  | don't know | yes | one month ; negative  | no | yes | 10.2 NO |
| yes | don't know | yes | from 2w- le; negative | no | yes | 10.9 NO |
| no  | don't know | yes | from 2w- le; negative | no | yes | 10.3 NO |
| no  | don't know | yes | from 2w- le; negative | no | yes | 9.3 NO  |
| no  | don't know | yes | one month ; negative  | no | yes | 9.1 NO  |
| yes | don't know | yes | 1week-2we; negative   | no | yes | 8.9 NO  |
| no  | don't know | yes | one month ; negative  | no | NO  | 11 NO   |
| no  | don't know | no  | no negative           | no | NO  | 11.1 NO |
| yes | don't know | yes | one month ; negative  | no | NO  | 11.3 NO |
| yes | don't know | yes | one month ; negative  | no | yes | 10.8 NO |
| yes | don't know | yes | from 2w- le; negative | no | yes | 10.2 NO |
| yes | don't know | no  | no negative           | no | yes | 9 NO    |
| yes | don't know | yes | one month ; negative  | no | yes | 10.3 NO |
| no  | don't know | yes | one month ; negative  | no | yes | 9.7 NO  |
| yes | don't know | yes | one month ; negative  | no | yes | 10.9 NO |
| yes | don't know | yes | one month ; negative  | no | NO  | 11 NO   |
| yes | don't know | no  | no negative           | no | yes | 10.2 NO |
| yes | don't know | yes | one month ; negative  | no | yes | 10.4 NO |
| yes | don't know | yes | from 2w- le; negative | no | yes | 9.2 NO  |
| yes | don't know | no  | no negative           | no | yes | 10.8 NO |
| no  | don't know | yes | from 2w- le; negative | no | NO  | 11 NO   |
| yes | don't know | yes | one month ; negative  | no | NO  | 11 NO   |
| yes | don't know | yes | one month ; positive  | no | yes | 9.3 NO  |
| yes | don't know | yes | one month ; negative  | no | yes | 10.1 NO |
| yes | don't know | yes | one month ; negative  | no | yes | 10.4 NO |
| yes | don't know | no  | no negative           | no | yes | 9.2 NO  |
| yes | don't know | yes | 1week-2we; negative   | no | yes | 9 NO    |
| yes | don't know | yes | 1week-2we; negative   | no | yes | 9.3 NO  |
| no  | don't know | yes | one month ; negative  | no | yes | 10 NO   |
| yes | don't know | yes | one month ; positive  | no | yes | 10.7 NO |

|     |            |     |                       |    |     |          |
|-----|------------|-----|-----------------------|----|-----|----------|
| yes | don't know | yes | one month ; negative  | no | yes | 10 NO    |
| yes | don't know | yes | one month ; negative  | no | yes | 9.7 NO   |
| yes | don't know | no  | no ; negative         | no | yes | 9.8 NO   |
| yes | don't know | yes | one month ; negative  | no | yes | 10.1 NO  |
| yes | don't know | yes | one month ; negative  | no | yes | 9.2 NO   |
| yes | don't know | yes | one month ; negative  | no | yes | 10.5 NO  |
| yes | don't know | yes | from 2w- le; positive | no | yes | 10.2 NO  |
| yes | don't know | yes | one month ; negative  | no | NO  | 11.1 NO  |
| yes | don't know | yes | one month ; negative  | no | yes | 10 NO    |
| no  | don't know | yes | one month ; negative  | no | yes | 8.9 NO   |
| yes | don't know | no  | no ; positive         | no | yes | 9.2 NO   |
| yes | don't know | yes | one month ; positive  | no | yes | 10 NO    |
| yes | don't know | yes | one month ; negative  | no | yes | 9.8 NO   |
| yes | don't know | no  | no ; negative         | no | yes | 10.4 NO  |
| yes | don't know | no  | no ; negative         | no | yes | 10.2 NO  |
| no  | don't know | no  | no ; negative         | no | yes | 10.9 NO  |
| no  | don't know | yes | one month ; negative  | no | NO  | 11.4 NO  |
| yes | don't know | yes | from 2w- le; negative | no | yes | 10.4 NO  |
| no  | don't know | no  | no ; negative         | no | NO  | 11 NO    |
| no  | don't know | yes | one month ; negative  | no | NO  | 11.3 NO  |
| yes | don't know | yes | from 2w- le; positive | no | yes | 10.9 NO  |
| yes | don't know | yes | from 2w- le; positive | no | yes | 10.2 yes |
| no  | don't know | yes | one month ; negative  | no | no  | 12.7 yes |
| yes | don't know | yes | one month ; positive  | no | yes | 9 yes    |
| yes | don't know | yes | one month ; negative  | no | yes | 10 yes   |
| yes | don't know | yes | one month ; negative  | no | no  | 11.6 yes |
| no  | don't know | yes | one month ; positive  | no | no  | 13 yes   |
| yes | don't know | yes | from 2w- le; positive | no | yes | 10.6 no  |
| no  | don't know | yes | from 2w- le; negative | no | no  | 11.5 no  |
| no  | don't know | yes | 1week-2we; negative   | no | yes | 7.2 no   |
| yes | don't know | no  | no ; positive         | no | no  | 11.8 no  |
| yes | don't know | yes | one month ; positive  | no | yes | 10.4 no  |
| yes | don't know | no  | no ; positive         | no | yes | 8.4 no   |
| yes | don't know | yes | from 2w- le; negative | no | yes | 10 no    |
| no  | don't know | no  | no ; positive         | no | yes | 10.6 no  |
| yes | don't know | yes | one month ; positive  | no | no  | 11.7 no  |
| yes | don't know | yea | from 2w- le; negative | no | no  | 11.8 no  |

| complication | ferritin | hepcidin | crp      | ida    | HB | RBCs | HCT  | Plt  |     |
|--------------|----------|----------|----------|--------|----|------|------|------|-----|
| NO           | 24.4     | 80.5     | negative | normal |    | 15.6 | 4.92 | 44.3 | 312 |
| NO           | 54.4     | 61.4     | negative | normal |    | 13.4 | 4.5  | 42.2 | 220 |
| NO           | 25.1     | 38.2     | negative | normal |    | 15   | 4.7  | 44.8 | 223 |
| NO           | 29.6     | 19.4     | negative | normal |    | 14.3 | 4.82 | 45.1 | 167 |
| NO           | 67.3     | 62.8     | negative | normal |    | 15.7 | 4.89 | 47.1 | 324 |
| NO           | 57.4     | 44.6     | negative | normal |    | 14.9 | 4.9  | 47.7 | 256 |
| NO           | 25.9     | 18       | negative | normal |    | 13.9 | 4.67 | 43   | 276 |
| NO           | 31.2     | 18.6     | negative | ida    |    | 11.3 | 4.56 | 46   | 198 |
| NO           | 25.6     | 19.2     | negative | ida    |    | 13.2 | 4.52 | 40.6 | 266 |
| NO           | 45.3     | 37.1     | negative | normal |    | 15.3 | 4.92 | 47   | 253 |
| NO           | 47.5     | 19.8     | negative | normal |    | 14   | 4.76 | 43   | 389 |
| NO           | 35.6     | 38.2     | negative | normal |    | 15.1 | 4.98 | 48.3 | 266 |
| NO           | 34.4     | 36.1     | negative | normal |    | 15   | 4.8  | 46.5 | 145 |
| NO           | 28.6     | 52.4     | negative | normal |    | 15.6 | 4.98 | 50.3 | 199 |
| NO           | 29.7     | 49.8     | negative | normal |    | 15.2 | 4.88 | 45.6 | 276 |
| NO           | 90.9     | 68.2     | negative | normal |    | 16.3 | 4.9  | 47.1 | 377 |
| NO           | 35.4     | 46.8     | negative | normal |    | 17   | 4.8  | 48   | 195 |
| NO           | 48.5     | 12.4     | negative | normal |    | 13.5 | 4.63 | 43   | 165 |
| NO           | 53       | 15.8     | negative | normal |    | 13.9 | 4.78 | 46.2 | 129 |
| NO           | 28.3     | 8.4      | negative | ida    |    | 12.6 | 4.76 | 43.5 | 175 |
| NO           | 41.8     | 11.8     | negative | ida    |    | 13   | 4.5  | 46.3 | 153 |
| NO           | 20.1     | 7.6      | negative | ida    |    | 12.8 | 4.6  | 45.8 | 197 |
| NO           | 28.5     | 8.2      | negative | normal |    | 14   | 4.78 | 47.9 | 200 |
| NO           | 16.7     | 41.8     | negative | normal |    | 14.9 | 4.91 | 46.9 | 165 |
| NO           | 30.3     | 7.3      | negative | ida    |    | 12.8 | 4.65 | 43   | 134 |
| NO           | 133.1    | 51.8     | negative | normal |    | 17.3 | 4.92 | 52.1 | 245 |
| NO           | 42.7     | 8.4      | negative | ida    |    | 13.2 | 4.8  | 44.6 | 275 |
| NO           | 24.2     | 6.5      | negative | ida    |    | 10.2 | 4.75 | 45   | 129 |
| NO           | 19.8     | 8.4      | negative | ida    |    | 11.2 | 4.82 | 42.9 | 136 |
| NO           | 24.4     | 92.5     | negative | normal |    | 16.8 | 4.86 | 49   | 155 |
| NO           | 75.1     | 68.2     | negative | normal |    | 17.2 | 4.91 | 52   | 285 |
| NO           | 72.4     | 12.4     | negative | normal |    | 13.9 | 4.53 | 44.5 | 254 |
| NO           | 25.3     | 7.2      | negative | ida    |    | 12.5 | 4.43 | 40.6 | 155 |
| NO           | 87.4     | 6.8      | negative | normal |    | 13.7 | 4.32 | 43.1 | 385 |
| NO           | 159.4    | 88.9     | negative | normal |    | 17.8 | 4.9  | 51   | 325 |
| NO           | 56.1     | 13.5     | negative | normal |    | 14.1 | 4.92 | 49   | 317 |
| NO           | 29.7     | 7.8      | negative | normal |    | 13.5 | 4.84 | 44.9 | 216 |
| NO           | 120.2    | 12.8     | negative | normal |    | 14   | 4.78 | 46.3 | 387 |
| NO           | 50.1     | 13.4     | negative | normal |    | 13.8 | 4.89 | 47.6 | 158 |

|    |       |               |        |      |      |      |     |
|----|-------|---------------|--------|------|------|------|-----|
| N0 | 48.5  | 13.8 negative | normal | 13.9 | 4.71 | 43.7 | 135 |
| N0 | 41    | 22.4 negative | normal | 14.2 | 4.7  | 44.8 | 276 |
| N0 | 27.6  | 8.9 negative  | normal | 13.6 | 4.76 | 42.9 | 123 |
| N0 | 37.7  | 45.8 negative | normal | 15.3 | 4.93 | 44.7 | 176 |
| N0 | 15.3  | 38.4 negative | normal | 14.8 | 4.98 | 46.7 | 243 |
| N0 | 77.6  | 34.1 negative | normal | 15.1 | 4.8  | 45   | 314 |
| N0 | 155.7 | 44.8 negative | normal | 17.3 | 4.92 | 50.1 | 129 |
| N0 | 171   | 43.2 negative | normal | 16.5 | 4.92 | 49.9 | 265 |
| N0 | 27.4  | 8.4 negative  | ida    | 13   | 4.76 | 43.8 | 245 |
| N0 | 23.1  | 7.2 negative  | ida    | 13.1 | 4.82 | 43.8 | 378 |
| N0 | 33.4  | 16.8 negative | normal | 14.9 | 4.65 | 45.9 | 142 |
| N0 | 18.4  | 6.2 negative  | ida    | 12.9 | 4.72 | 43.9 | 175 |
| N0 | 19.4  | 5.8 negative  | ida    | 13   | 4.7  | 43   | 145 |
| N0 | 19    | 6.2 negative  | ida    | 12.3 | 4.61 | 44.1 | 134 |
| N0 | 17.2  | 9.4 negative  | normal | 13.9 | 4.54 | 44.9 | 188 |
| N0 | 29    | 18.9 negative | normal | 14.2 | 4.31 | 46.5 | 152 |
| N0 | 33.1  | 10.2 negative | normal | 14.7 | 4.78 | 48.6 | 164 |
| N0 | 46.2  | 37.1 negative | normal | 15.3 | 4.82 | 48.1 | 166 |
| N0 | 23.8  | 7.8 negative  | ida    | 13   | 4.71 | 47.5 | 124 |
| N0 | 17.9  | 6.2 negative  | ida    | 12.9 | 4.87 | 44.6 | 156 |
| N0 | 31.9  | 9.8 negative  | normal | 14   | 4.54 | 44.1 | 98  |
| N0 | 17.4  | 8.4 negative  | ida    | 12.7 | 4.86 | 44.9 | 176 |
| N0 | 13.9  | 8.1 negative  | normal | 13.5 | 4.58 | 43.1 | 124 |
| N0 | 28.2  | 7.8 negative  | normal | 13.8 | 4.65 | 44.4 | 175 |
| N0 | 31    | 8.4 negative  | ida    | 13.1 | 4.61 | 48.4 | 153 |
| N0 | 30.1  | 9.1 negative  | normal | 13.6 | 4.63 | 47.2 | 188 |
| N0 | 27.3  | 8.9 negative  | normal | 14   | 4.58 | 44.3 | 136 |
| N0 | 33.9  | 6.2 negative  | ida    | 11.6 | 4.58 | 43.1 | 266 |
| N0 | 29.8  | 18.7 negative | normal | 14.4 | 4.87 | 46.1 | 245 |
| N0 | 38    | 21.4 negative | normal | 15.3 | 4.98 | 46.9 | 132 |
| N0 | 34.9  | 12.8 negative | normal | 15.5 | 4.79 | 47   | 157 |
| N0 | 18.4  | 6.4 negative  | ida    | 12.1 | 4.61 | 44.9 | 242 |
| N0 | 28.9  | 13.4 negative | normal | 14.6 | 4.87 | 45.1 | 145 |
| N0 | 19.8  | 15.8 negative | normal | 14.7 | 4.82 | 45.4 | 177 |
| N0 | 16.9  | 8.9 negative  | ida    | 11.2 | 4.76 | 44.2 | 125 |
| N0 | 19.4  | 5.4 negative  | ida    | 11   | 4.56 | 43.9 | 187 |
| N0 | 10.7  | 4.8 negative  | ida    | 10.9 | 4.51 | 42.9 | 145 |
| N0 | 16.9  | 6.5 negative  | ida    | 13.2 | 4.66 | 44.8 | 143 |
| N0 | 19.9  | 4.2 negative  | ida    | 10.2 | 4.5  | 40.3 | 234 |



|              |      |               |        |      |      |      |     |
|--------------|------|---------------|--------|------|------|------|-----|
| NO           | 20.7 | 5.2 negative  | ida    | 11.2 | 4.76 | 45   | 285 |
| NO           | 13.9 | 3.8 negative  | ida    | 9.9  | 4.62 | 42.1 | 256 |
| NO           | 18.6 | 7.2 negative  | ida    | 13.2 | 4.69 | 42.1 | 154 |
| NO           | 22.9 | 5.1 negative  | ida    | 11.3 | 4.78 | 45.5 | 197 |
| NO           | 17.3 | 3.1 negative  | ida    | 9.9  | 4.59 | 41.8 | 293 |
| NO           | 19.7 | 5.4 negative  | ida    | 12   | 4.78 | 46.9 | 246 |
| NO           | 13.7 | 3.8 negative  | ida    | 10.9 | 4.72 | 44.8 | 174 |
| NO           | 22.9 | 6.7 negative  | ida    | 11.6 | 4.8  | 46.9 | 145 |
| NO           | 23.1 | 4.1 negative  | ida    | 13   | 4.61 | 42   | 192 |
| NO           | 9.8  | 2.8 negative  | ida    | 9.5  | 4.33 | 41.7 | 137 |
| NO           | 9    | 3.1 negative  | ida    | 9.8  | 4.48 | 44.3 | 273 |
| NO           | 16.3 | 5.4 negative  | ida    | 12.9 | 4.41 | 44.1 | 194 |
| NO           | 13.9 | 7.5 negative  | ida    | 12.1 | 4.4  | 40.9 | 134 |
| NO           | 22   | 9.4 negative  | ida    | 10.8 | 4.6  | 43   | 188 |
| NO           | 31.9 | 12.7 negative | ida    | 12.4 | 4.72 | 45   | 153 |
| NO           | 29.1 | 11.6 negative | normal | 13.6 | 4.62 | 43.7 | 173 |
| NO           | 44.7 | 38 negative   | normal | 14.6 | 4.89 | 45.9 | 293 |
| NO           | 36.2 | 12.3 negative | normal | 15.1 | 4.91 | 46.5 | 150 |
| NO           | 33.9 | 10.4 negative | ida    | 13   | 4.87 | 46.1 | 174 |
| NO           | 48.3 | 39.2 negative | normal | 16.9 | 4.92 | 49   | 135 |
| NO           | 33.5 | 29 negative   | normal | 15   | 4.82 | 45.7 | 173 |
| preeclampsia | 13.8 | 5.9 negative  | ida    | 10.2 | 4.72 | 45   | 293 |
| no           | 28.6 | 11 negative   | ida    | 12.9 | 4.92 | 47.8 | 173 |
|              | 25   | 13 negative   | normal | 14   | 4.88 | 45.9 | 298 |
| bleeding     | 9.6  | 8.6 negative  | ida    | 10.8 | 4.7  | 44.7 | 342 |
|              | 17.8 | 5.9 negative  | ida    | 9.8  | 4.6  | 43   | 175 |
| prom         | 28   | 19 negative   | ida    | 12.9 | 4.92 | 47.8 | 342 |
|              | 9    | 5.1 negative  | ida    | 9.5  | 4.5  | 43.1 | 165 |
| no           | 36   | 18.4 negative | normal | 14.6 | 4.87 | 46.8 | 198 |
|              | 29   | 27.4 negative | normal | 13.3 | 4.87 | 46   | 245 |
| no           | 29   | 34 negative   | ida    | 11   | 4.76 | 45   | 241 |
|              | 27.9 | 26.7 negative | ida    | 13   | 4.8  | 44.6 | 172 |
| bleeding     | 122  | 93 negative   | normal | 16   | 4.9  | 49.7 | 387 |
| no           | 29   | 17.9 negative | normal | 15   | 4.92 | 49   | 284 |
| bleeding     | 5    | 2.9 negative  | ida    | 9.1  | 4.5  | 43   | 172 |
| convulsion   | 83   | 97.1 negative | ida    | 13   | 4.8  | 44.1 | 420 |
| Preeclampsia | 27.3 | 11.5 negative | normal | 14.1 | 4.78 | 46.7 | 159 |
| bleeding     | 43   | 26.8 negative | ida    | 13.1 | 4.76 | 45.6 | 189 |
| bleeding     | 51   | 96 negative   | normal | 17.1 | 4.98 | 49.1 | 387 |
| preeclampsia | 29   | 11 negative   | ida    | 12.9 | 4.79 | 45.1 | 298 |
| convulsion   | 71   | 11.3 negative | ida    | 12.3 | 4.7  | 46   | 214 |
| no           | 36   | 41 negative   | normal | 17.8 | 4.99 | 49   | 193 |

| WBCs | pallor 1min | hypoxia 1min | gestational : term\preterm | birth wt | low birth wt | small for ga. | labor       |
|------|-------------|--------------|----------------------------|----------|--------------|---------------|-------------|
| 7.6  | no          | yes          | 38 term                    | 2,9      | normal       | normal        | elective cs |
| 6.8  | no          | no           | 38 term                    | 2,3      | lbw          | SGA           | elective cs |
| 5.2  | no          | yes          | 39 term                    | 3,7      | normal       | normal        | elective cs |
| 4.6  | yes         | no           | 37 term                    | 2,8      | normal       | normal        | elective cs |
| 6.7  | no          | no           | 40 term                    | 3,8      | normal       | normal        | elective cs |
| 5.1  | no          | no           | 37 term                    | 3,2      | normal       | normal        | elective cs |
| 4.6  | no          | no           | 37 term                    | 2,2      | lbw          | normal        | elective cs |
| 7.9  | no          | no           | 37 term                    | 3,5      | normal       | normal        | elective cs |
| 10.3 | no          | no           | 39 term                    |          | 4 normal     | normal        | elective cs |
| 6.8  | no          | no           | 38 term                    | 2,2      | lbw          | SGA           | elective cs |
| 5.2  | no          | no           | 38 term                    | 3,7      | normal       | normal        | elective cs |
| 4.9  | no          | no           | 41 term                    | 3,8      | normal       | normal        | elective cs |
| 7.4  | no          | no           | 38 term                    | 2,9      | normal       | normal        | elective cs |
| 6.8  | no          | yes          | 37 term                    | 2,5      | normal       | normal        | elective cs |
| 5.1  | no          | yes          | 37 term                    | 4,1      | normal       | normal        | elective cs |
| 7.9  | no          | no           | 38 term                    | 3,8      | normal       | normal        | elective cs |
| 4.8  | no          | yes          | 38 term                    | 3,3      | normal       | normal        | elective cs |
| 5.9  | no          | no           | 38 term                    |          | 3 normal     | normal        | elective cs |
| 6.2  | no          | no           | 36 term                    | 3,1      | normal       | normal        | elective cs |
| 9.3  | yes         | no           | 39 term                    | 3,7      | normal       | normal        | elective cs |
| 6.3  | yes         | no           | 37 term                    | 3,2      | normal       | normal        | elective cs |
| 4.6  | yes         | no           | 41 term                    | 2,15     | lbw          | SGA           | elective cs |
| 6.7  | yes         | no           | 38 term                    | 3,9      | normal       | normal        | elective cs |
| 5.7  | no          | yes          | 37 term                    |          | 2.8 normal   | normal        | elective cs |
| 8.3  | yes         | no           | 38 term                    | 2,6      | normal       | normal        | elective cs |
| 4.1  | no          | no           | 37 term                    | 3,7      | normal       | normal        | elective cs |
| 5.8  | yes         | no           | 39 term                    | 3,9      | normal       | normal        | elective cs |
| 8.1  | yes         | no           | 37 term                    | 2,4      | lbw          | normal        | elective cs |
| 6.2  | yes         | no           | 37 term                    | 2,4      | lbw          | normal        | elective cs |
| 9.6  | no          | yes          | 38 term                    | 3,7      | normal       | normal        | elective cs |
| 6.2  | no          | yes          | 38 term                    | 3,4      | normal       | normal        | elective cs |
| 7.1  | no          | no           | 38 term                    | 2,7      | normal       | normal        | elective cs |
| 8.3  | yes         | no           | 36 preterm                 |          | 3 normal     | normal        | elective cs |
| 5.2  | yes         | no           | 39 term                    | 2,4      | lbw          | SGA           | elective cs |
| 9.4  | no          | no           | 39 term                    | 3,9      | normal       | normal        | elective cs |
| 5.2  | no          | no           | 38 term                    | 3,1      | normal       | normal        | elective cs |
| 4.5  | no          | no           | 36 preterm                 | 2,4      | lbw          | normal        | elective cs |
| 6.1  | no          | no           | 35 preterm                 | 3,6      | normal       | normal        | elective cs |
| 9.3  | no          | no           | 38 term                    | 2,9      | normal       | normal        | elective cs |

|          |    |            |      |            |        |             |
|----------|----|------------|------|------------|--------|-------------|
| 7.4 yes  | no | 38 term    |      | 4 normal   | normal | elective cs |
| 6.2 no   | no | 38 term    | 3,1  | normal     | normal | elective cs |
| 9.3 yes  | no | 37 term    | 2,9  | normal     | normal | elective cs |
| 6.2 no   | no | 37 term    |      | 2.6 normal | normal | elective cs |
| 5.1 no   | no | 39 term    |      | 2.8 normal | normal | elective cs |
| 5.1 no   | no | 38 term    | 2,8  | normal     | normal | elective cs |
| 7.2 no   | no | 39 term    |      | 3.8 normal | normal | elective cs |
| 10.3 no  | no | 41 term    | 3,6  | normal     | normal | elective cs |
| 3.6 no   | no | 38 term    | 2,5  | normal     | normal | elective cs |
| 7.1 no   | no | 38 term    | 2,8  | normal     | normal | elective cs |
| 8.3 no   | no | 36 preterm | 2,4  | lbw        | normal | elective cs |
| 6.9 no   | no | 38 term    | 2,6  | normal     | normal | elective cs |
| 3.9 no   | no | 38 term    | 3,6  | normal     | normal | elective cs |
| 10.3 yes | no | 38 term    | 2,23 | lbw        | SGA    | elective cs |
| 8.3 yes  | no | 37 term    | 3,9  | normal     | normal | elective cs |
| 5.7 no   | no | 39 term    | 3,2  | normal     | normal | elective cs |
| 7.2 no   | no | 37 term    | 2,9  | normal     | normal | elective cs |
| 8.3 no   | no | 38 term    | 2,8  | normal     | normal | elective cs |
| 9.2 no   | no | 39 term    | 2,7  | normal     | normal | elective cs |
| 5.1 yes  | no | 36 preterm |      | 3 normal   | normal | elective cs |
| 10.1 yes | no | 38 term    | 2,1  | lbw        | SGA    | elective cs |
| 3.9 yes  | no | 38 term    | 2,9  | normal     | normal | elective cs |
| 3.8 yes  | no | 37 term    | 3,5  | normal     | normal | elective cs |
| 4.1 yes  | no | 38 term    | 2,7  | normal     | normal | elective cs |
| 5.9 no   | no | 38 term    | 2,5  | normal     | normal | elective cs |
| 6.3 no   | no | 37 term    | 3,9  | normal     | normal | elective cs |
| 8.3 no   | no | 38 term    |      | 4 normal   | normal | elective cs |
| 6.2 yes  | no | 36 preterm | 2,6  | normal     | normal | elective cs |
| 7.1 no   | no | 38 term    | 2,8  | normal     | normal | elective cs |
| 2.9 no   | no | 39 term    | 2,1  | lbw        | SGA    | elective cs |
| 4.9 no   | no | 38 term    | 2,2  | lbw        | SGA    | elective cs |
| 6.8 no   | no | 39 term    | 2,7  | normal     | normal | elective cs |
| 7.3 no   | no | 38 term    | 2,9  | normal     | normal | elective cs |
| 9.3 no   | no | 38 term    | 3,6  | normal     | normal | elective cs |
| 5.9 yes  | no | 38 term    |      | 3 normal   | normal | elective cs |
| 4.5 yes  | no | 36 preterm | 2,3  | lbw        | normal | elective cs |
| 6.7 yes  | no | 37 term    | 3,1  | normal     | normal | elective cs |
| 4.1 yes  | no | 38 term    | 3,6  | normal     | normal | elective cs |
| 3.9 yes  | no | 36 preterm | 2,3  | lbw        | normal | elective cs |

|          |     |            |      |          |        |             |
|----------|-----|------------|------|----------|--------|-------------|
| 6 yes    | no  | 36 preterm | 2,7  | normal   | normal | elective cs |
| 6.2 yes  | no  | 37 term    | 2,1  | lbw      | normal | elective cs |
| 5.9 yes  | no  | 38 term    | 1,9  | lbw      | SGA    | elective cs |
| 9.9 yes  | no  | 38 term    |      | 2 lbw    | SGA    | elective cs |
| 10.2 yes | no  | 37 term    | 2,3  | lbw      | normal | elective cs |
| 2.9 yes  | no  | 37 term    | 1,9  | lbw      | SGA    | elective cs |
| 4.7 yes  | no  | 39 term    | 2,6  | normal   | normal | elective cs |
| 6.9 yes  | no  | 39 term    | 3,8  | normal   | normal | elective cs |
| 7.4 yes  | no  | 38 term    | 3,1  | normal   | normal | elective cs |
| 7.9 yes  | no  | 38 term    |      | 2 lbw    | SGA    | elective cs |
| 6.8 yes  | no  | 38 term    | 2,4  | lbw      | normal | elective cs |
| 5.2 yes  | no  | 36 preterm | 2,9  | normal   | normal | elective cs |
| 6.3 yes  | no  | 38 term    | 2,3  | lbw      | normal | elective cs |
| 5.8 yes  | no  | 37 term    | 3,1  | normal   | normal | elective cs |
| 8.1 yes  | no  | 37 term    | 2,5  | normal   | normal | elective cs |
| 4.1 yes  | no  | 39 term    | 2,7  | normal   | normal | elective cs |
| 3.9 no   | no  | 39 term    |      | 3 normal | normal | elective cs |
| 9.4 no   | no  | 37 term    | 2,9  | normal   | normal | elective cs |
| 2.8 no   | no  | 36 preterm | 2,3  | lbw      | normal | elective cs |
| 5.2 no   | yes | 39 term    | 3,5  | normal   | normal | elective cs |
| 9.8 no   | no  | 39 term    | 3,9  | normal   | normal | elective cs |
| 5.8 yes  | yes | 34 preterm | 1,8  | lbw      | normal | emergency c |
| 2.8 no   | no  | 37 term    | 2,3  | lbw      | normal | elective cs |
| 4.9 no   | yes | 37 term    | 2,1  | lbw      | normal |             |
| 5.8 yes  | no  | 38 term    | 2,1  | lbw      | SGA    | emergency c |
| 6.9 yes  | no  | 38 term    | 2,4  | lbw      | normal |             |
| 7.4 no   | no  | 35 preterm |      | 2 lbw    | normal | emergency c |
| 4.8 yes  | no  | 35 preterm | 1,8  | lbw      | normal |             |
| 6.5 no   | no  | 38 term    | 2,5  | normal   | normal | elective cs |
| 4.1 no   | no  | 38 term    | 2,6  | normal   | normal |             |
| 3.9 no   | no  | 39 term    | 2,1  | lbw      | SGA    | elective cs |
| 4.7 no   | no  | 39 term    |      | 2 lbw    | SGA    |             |
| 7.8 no   | no  | 36 preterm | 2,8  | normal   | normal | emergency c |
| 4.9 no   | no  | 38 term    | 3,9  | normal   | normal | elective cs |
| 3.9 yes  | yes | 34 preterm | 1,7  | lbw      | normal | emergency c |
| 8.1 no   | no  | 37 term    | 1,8  | lbw      | SGA    | emergency c |
| 7.2 no   | no  | 36 preterm | 1,7  | lbw      | normal | emergency c |
| 3.9 no   | yes | 39 term    | 4,43 | normal   | normal | emergency c |
| 8.1 no   | no  | 38 term    | 2,3  | lbw      | normal | emergency c |
| 4.9 yes  | no  | 36 preterm | 1,9  | lbw      | normal | emergency c |
| 6.2 no   | yes | 34 preterm | 1,8  | lbw      | normal | emergency c |
| 4.8 no   | no  | 41 term    | 2,1  | lbw      | SGA    | elective cs |





CS

CS

CS

CS

VD

CS

CS

CS

CS

VD

CS
